# Supplementary material
Source: PubMed Central journal article supplement (PMC2671707)
Supplement: tpc.108.064865_1.pdf [file tpc.108.064865_1.pdf]

**Supplemental Figure 1: Alignment of CHMP1 protein sequences.** The accession numbers and gene identifiers for the sequences used in this analysis are provided in the Methods section.  
**CLUSTALW - Protein Alignment, 215 amino acids**

```

Gallus CHMP1A      -----M DDTLFLQKFT AKQLEKLAKK AEKDSKAEQA KVKKALQQKNVECARVYAEN AIRKKNEGLN WLRMASRVDA VASKVQTAVT MKGVTKNMAQ
Homo CHMP1A       -----M DDTLFLQKFT AKQLEKLAKK AEKDSKAEQA KVKKALLQKNVECARVYAEN AIRKKNEGVN WLRMASRVDA VASKVQTAVT MKGVTKNMAQ
Xenopus CHMP1A    -----M DDTLFLQKFT AKQLEKLAKK AEKDSNTEQA KVKKALQQKNVEVARVYAEN AIRKKNEGLN WLRMASRVDA VASKVQTAVT MKGVTKNMAQ
Danio CHMP1A      -----M DDTLFLQKFT SKQLERLAKK AEKDSKSEQA KVKKALQQKNVECARVYAEN AIRKKNEGLN WLRMASRVDA VASKVQTALT MKGVAKNMTQ
Strongyloc. CHMP1A ----- ---MFQLKFS SKQLERYAKK AEKEQKVQSG KVKKALEQKNPEGARIYAEN CIRKKNESLN FLRMSARIDA VSSRIKSAMV MKQVSKNMGQ
Gallus CHMP1B     -----MSNM EKHLFNLKFA AKELNRNSKR CDKEEKAEKA KIKKAIQKGNMEVARIHAEN AIRQKNQAVN FLRMSARVDA VAARVQTAVT MGKVTKSMAG
Homo CHMP1B       -----M EKHLFNLKFA AKELSRSAKK CDKEEKAEKA KIKKAIQKGNMEVARIHAEN AIRQKNQAVN FLRMSARVDA VAARVQTAVT MGKVTKSMAG
Xenopus CHMP1B    -----MSSM EKHLFNLKFA AKELNRNAKK CEKEEKTEKA KIKKAIQKGNTEIARIHAEN AIRQKNQGIN FLRMSARVDA VAARVQTAVT MGKVTKSMAG
Danio CHMP1B      -----MSSM EKHLFNLKFA AKELQRNSKK CDKEEKAEKV KVKKAIQKGNMEVARIHAEN AIRQKNQSVN FLRMSARVDA VAARVQTAVT MNQVTKSMAG
Strongyloc. CHMP1A -----MSSSL EKHLFNLKFA AKQMNRESKK CEKEEKAECT KLKKAIQKGNVEGARIHAEN AIRNKSQALN FLRMSARVDG VASRVQSAVA MKKVTSSMSG
Anopheles CHMP1  -----MSAM EKHLFNLKFA VKELERNAKK CEKEEKAAIL KTKKAIQKGNTEVARIHAEN AIRQKSQSLN YLRMSARVDA VASRVQTALT TRNVTNSMAG
Drosophila CHMP1 -----MSTSSM EKHLFNLKFA VKELERNNAKK CEKEEKLEKA KAKKAIQKGNMDVARIHAEN AIRQKNQAVN YLRMSARVDA VASRVQSALT TRKVTGSMAG
Caenorhabd. CHMP1 MGAGESSMAL EKHLFDLKFA AKQLEKNAQR CEKDEKVEKD KLTAAIKKGNKEVAQVHAEN AIRKKNEAVN YIKMAARIDA VAARVQTAAAT QKRVTASMSG
Ustilago DID2     -----MSGL EKSLFQKFT AKSLQRQARK ATKDETAEKA KLKALAQQGNTGARIYASN AIRKKNESLN LLRLGSRIDA VASRVETAVT MRQVSGSMAS
Laccaria DID2     -----MSNL EKTFLQKFT AKSLNRQAKK AOKDENSEKT RLKKALQQGNNDGARIYASN AIRKKSEALN LLRLSSRIDA VASRVETAVT MRQVTGNMTS
Candida DID2      -MSRNPAAAGL ENTFLQKFT SKQLQKQAAK ASKEEKQETN KLKALNE-NEEIARIYASN AIRKKNERLQ LLKLASRVDS VASRVQTAVT MRQVSSMAQ
Saccharomyces DID2 -MSRNSAAGL ENTFLQKFT SKQLQKQANK ASKEEKQETN KLKRALNE-NEDISRIYASN AIRKKNERLQ LLKLASRVDS VASRVQTAVT MRQVSASMGQ
Pichia DID2       -----MAGL EQSLFQKFT AKQLNRQASK AAKEELQEKA KIKKALQGNNDIAQLYAQN AIRKSNERVN LLRLASRIDA VASRVQTAVT MKSVTGNMTQ
Schizosach. DID2  -----MS-- ----LSMNFF TAHLS----- -IAIAITKGNSEIARIYASN AIRKQESLN LLKLSSRIDA VSSRLQTAVT MRAVSGNMAG
Physcom. CHMP1C   MWGRSGQDKL MDQIFQKFT SKSLVRAAKK CEKDEKSEKL KVKKAIEKGNMDGARIYAQN AIRKHNEQLN YLRLSSRLDA VVAQLGTQSK LQTVAKSMAG
Physcom. CHMP1D   MWGRSSQDKL MDQIFQKFT SKSLVRAAKK CEKEEKGEKL KVKKAIEKGNMDGARIYAQN AIRKHNEQLN YLRLSSRLDA VVARLGTQSK MQTISKSMAG
Physcom. CHMP1B   -MGGGAQEKL LDQIFQKFT SKSLVREAKK CEKDEKAEKL KVKKAMEKNNMDGARIYAQN AIRKHNEHLN YLRLSSRLDA VVAQLNTQSK MQTISKSMGS
Physcom. CHMP1A   -MGGG-QEKL LNQIFQKFT AKTLVRQAKK CESEEKAEKL KVKKAIEKGNMDGARIYAQN AIRKHNEQLN YLRLASRLDA VVSRLGTQSK MQTITKSMGS
Oryza CHMP1       -MGN--PEKL MTQIFDLKFT SKSLQRQARK CEKEEKEQKL KVKKAIEKGNMDGARIYAEN AIRKRTEHMN YLRLASRLDA VVARLDTQAK MQVIGKSMAN
Zea SAL1          -MGN--PEKL MNQIFDLKFT SKSLQRQARK CEKEEKEQKL KVKKAIEKGNMDGARIYAEN AIRKRTEHMN YLRLASRLDA VVARLDTQAK MQVIGKSMQS
Arabidopsis CHMP1B -MGN--TDKL MNQIFELKFT SKSLQRQARK CEKEERSEKL KVKKAIEKGNMDGARIYAEN AIRKRSEQMN YLRLSSRLDA VVARLDTQAK MATITKSMTN
Arabidopsis CHMP1A -MGN--TDKL MNQIFDLKFT SKSLQRQSRK CEKEEKAEKL KVKKAIEKGNMDGARIYAEN AIRKRSEQMN YLRLASRLDA VVARLDTQAK MTTITKSMTN
Nicotiana CHMP1   -MGN--TEKL MNQIMELKFT SKSLQRQARK CEKDEKSEKL KVKKAIEKGNMDGARIYAEN AIRKRSEQMN YLRLSSRLDA VVARLDTQAK MTTISKSMGN
Chlamyd. CHMP1    -MGG---EKL LDQIFNLKFT AKQLARSAVK CEKEEKAEKL KVKKAIEKGNMEGAKIYAQN AIRKKNEQLN YMKLASRLDA TVSRLETQAK MQMVQKNMAG
Trypanosoma CHMP1 -MS---VNQL QDLHFQKLYV VKQFNKNSTR CEKEQKAELG KCKKAMAKGNMDIARIFAEN SIRKRNESLS HLRLASRMDA VVSRLDTAIAK MNKVTRGMSQ
Leishmania CHMP1  -MS---VEKL YDIQFQKFT AKQFLKNASR CEKEQKQEMN KCKQAMEKNNMEGARIYAQN SIRKKNEALN HLRLSARMDA VVARLDTAIAK MKMVTKNMGQ

```

|                    |             |           |     |           |     |          |     |               |            |          |          |          |         |     |         |            |                |          |
|--------------------|-------------|-----------|-----|-----------|-----|----------|-----|---------------|------------|----------|----------|----------|---------|-----|---------|------------|----------------|----------|
| Gallus CHMP1A      | VTKALDKALS  | SMDLQKVS  | AV  | MDKFEQQVQ | N   | LDVHTSV  | MED | SMSSATTLTTPQE | QVDSLIV    | QIAEENGL | EI       | MDQLNQL  | P       | EG  | AS----  | AVG-       | -ESSMRSQE-     |          |
| Homo CHMP1A        | VTKALDKALS  | TMDLQKVSS | V   | MDRFEQQVQ | N   | LDVHTSV  | MED | SMSSATTLTTPQE | QVDSLIM    | QIAEENGL | EV       | LDQLSQL  | P       | EG  | AS----  | AVG-       | -ESSVRSQE-     |          |
| Xenopus CHMP1A     | VTKALDKALS  | SMDLQKVS  | AV  | MDKFDQQVQ | N   | LDVHTSV  | MED | SMSSAMTLTTPQE | QVDNLIV    | QIAEENGL | EV       | MDQLNQL  | P       | QG  | AS----  | SVG-       | -ESSTRTQE-     |          |
| Danio CHMP1A       | VTKALDKALS  | SMDLQKVS  | AV  | MDKFETQVQ | N   | LDVHTSV  | MED | SMSSATTLSTPQQ | QVDDLLI    | QIAEESGL | EV       | EDQLSQL  | P       | AG  | AS----  | ALG-       | -ETSARAQEK     |          |
| Strongyloc. CHMP1A | VVKGLDKALQ  | SMDLQKIS  | GI  | MEKFESQF  | ED  | LDVHTQV  | LEG | SMGAATTLSTPQ  | DQVDQLI    | QVAEENGL | EM       | ISDLAAAP | P       | MA  | GTGTLAS | ST-        | -ASSSRTMVE     |          |
| Gallus CHMP1B      | VVKSMDATLK  | SMNLEKIS  | SAL | MDKFEHQF  | FET | LDVQTQQ  | MEN | TMSNTTTLTTPQ  | NQVDMLLQ   | EMADEAGL | DL       | NMELPQ   | G       | --- | ---     | QTGSV      | ---            | TS-VASAE |
| Homo CHMP1B        | VVKSMDATLK  | TMNLEKIS  | SAL | MDKFEHQF  | FET | LDVQTQQ  | MED | TMSSTTTLTTPQ  | NQVDMLLQ   | EMADEAGL | DL       | NMELPQ   | G       | --- | ---     | QTGSV      | ---            | TS-VASAE |
| Xenopus CHMP1B     | VVKSMDATLK  | SMNLEKIS  | SAL | MDKFEHQF  | FET | LDVQTQQ  | MED | TMSNTTTLTTPQ  | NQVDNLLH   | EMADEAGL | DL       | SMELPQ   | G       | --- | ---     | QTGSV      | ---            | TS-VASTE |
| Danio CHMP1B       | VVKGMDATLK  | SMNLEKIS  | GL  | MEKFERQF  | FET | LDVQTAQ  | MED | SMSSTTTLTTPQ  | GQVDTLMM   | EMADEAGL | DL       | NMELPQ   | G       | --- | ---     | QTGSV      | ---            | TS-VASAE |
| Strongyloc. CHMP1A | VVKAMDSAMK  | SMNLEKIS  | SAL | MEKFEKQF  | FED | MDVQTQC  | MED | TMSASTTLTTPQ  | SQVDSLMS   | QVADEAGL | EL       | NMELPSS  | ---     | --- | ---     | QTGSL      | ---            | QS-TASAE |
| Anopheles CHMP1    | VVKAMDAAMK  | GMNLEKIS  | GL  | MDKFESQF  | FED | LDVQSSY  | MEN | TMSQTTTTAVP   | QNDVESLMQ  | RVADEAGL | EL       | NMELPSG  | P       | --- | ---     | SSIAI      | ---            | ASTQASTE |
| Drosophila CHMP1   | VVKAMDAAMK  | GMNLEKIS  | SSL | MEKFESQF  | FED | LDVQSSV  | MEG | TMSDVTVTSVP   | QGDVDNLLQ  | QVADEAGL | EL       | NMELPSG  | V       | --- | ---     | QSQSV      | ---            | ASTAVSQE |
| Caenorhabd. CHMP1  | VVKAMESAMK  | SMNLEKIV  | QQL | MDRFERDF  | FED | LDVTTKT  | MEK | TMDGTTVLNAP   | KSQVDALIA  | EAADKAGI | EL       | NQELPSN  | ---     | --- | ---     | VPTAL      | ---            | TGTQAVSE |
| Ustilago DID2      | VVKGMDKAME  | SMNLERMS  | VM  | MDKFETQF  | FED | MDVQTSY  | MEG | TIGATTAQSM    | PQDQVDLLM  | QVADENGI | EI       | NHKLGEGL | L       | LL  | EGKVADL | APK        | VPDAKVKDKE     |          |
| Laccaria DID2      | VVKGMDKAME  | SMNLERIS  | MV  | MDKFENQF  | TD  | LDVQTSI  | MED | TMSATTAISTP   | QDQIDQLLR  | QTAEENIE | L        | QHDLASK  | DLN     | A-- | VADLN-- | -SPNKVRE-E |                |          |
| Candida DID2       | VCKGMDKALQ  | NMNLQQIT  | IMI | MEKFEQQF  | FED | LDTSVNV  | YED | MGVASDAVLV    | DNDKVDEL   | MG       | KVADENGM | EL       | KQSARLE | N-- | ---     | IPDIKQ-    | -KET-VDDEK     |          |
| Saccharomyces DID2 | VCKGMDKALQ  | NMNLQQIT  | IMI | MDKFEQQF  | FED | LDTSVNV  | YED | MGVNSDAMLV    | DNDKVDEL   | MS       | KVADENGM | EL       | KQSAKLD | N-- | ---     | VPEIKA-    | -KEVNVVDEK     |          |
| Pichia DID2        | VIRGMDKALQ  | TMNLERIS  | LV  | MDKFENQF  | FED | LDASTNY  | YET | ATNNVNALTTP   | QEQVDELMS  | QVADEAGI | EM       | KQGLNET  | K       | --- | ---     | VDIATP-    | -PVSNMTEEK     |          |
| Schizosach. DID2   | VVRGMDRAMK  | TMNLEMIS  | QV  | MDKFEAQF  | DD  | VNVQTYG  | MNK | AMGSVTAVDTP   | QEVDVLLM   | TVADEAGL | EF       | NQNMNNNL | S-      | --- | ---     | VPAAS--    | -VPTPAAPVE     |          |
| Physcom. CHMP1C    | IVKSILDSALA | VGNMEKIS  | QST | MDQFEKTF  | FMN | MEVQSEFI | ET  | AMAGSTSLSTP   | EDDVNSLLH  | QVADDYGL | EV       | SVNLP    | -----   | --- | ---     | QAGATAIP-  | -VKETPTVNV     |          |
| Physcom. CHMP1D    | IVKSILDSALA | VGNMEKIS  | QST | MDQFEKTF  | VN  | MEVQSEFI | ET  | AMAGSTSLSTP   | EDVNSLLH   | QVADDYGL | EV       | SVNLP    | -----   | --- | ---     | QAGATAMP-  | -VKETATVNA     |          |
| Physcom. CHMP1B    | IVKALDSSLA  | VGNMEKIS  | QST | MDQFEKTF  | VN  | MEVQAEFV | EN  | AMAGSTSLSTP   | EDVNSLIN   | QVADDYGL | EV       | SLGLP    | -----   | --- | ---     | QAGATSVP-  | -AKESSTESA     |          |
| Physcom. CHMP1A    | IVKALDSALA  | VGNMEKIS  | QST | MDQFEKTF  | VN  | MEVQSEFV | ES  | AMAGSTSLSTP   | EDVNSLMH   | QVADDYGL | EV       | SVGLP    | -----   | --- | ---     | QA-ASHMP-  | -LGDAESTVS     |          |
| Oryza CHMP1        | IVKSILDSALA | TGNLQKMS  | SET | MDNFERQF  | VN  | MEVQAEFM | EG  | AMAGSTSLSTP   | ETEVNSLMQ  | QVADDYGL | EV       | SVGLP    | -----   | --- | ---     | QAAAHAI    | PA -AKEKEKAVD  |          |
| Zea SAL1           | IVKSILDSSLA | TGNLQKMS  | SET | MDNFERQF  | VN  | MEVQAEFM | EG  | AMAGSTSLSTP   | ETEVNSLMQ  | QVADDYGL | EV       | SVGLP    | -----   | --- | ---     | QAAAHAI    | PA -AKDKEK-VD  |          |
| Arabidopsis CHMP1B | IVKSLESSLT  | TGNLQKMS  | SET | MDSFEKQF  | VN  | MEVQAEFM | DN  | AMAGSTSLSTP   | EGEVNSLMQ  | QVADDYGL | EV       | SVGLP    | -----   | --- | ---     | QPAGHAI    | P -TKTEEK-VE   |          |
| Arabidopsis CHMP1A | IVKSLESSLA  | TGNLQKMS  | SET | MDSFEKQF  | VN  | MEVQAEFM | EN  | AMAGSTSLSTP   | EGEVNSLMQ  | QVADDYGL | EV       | SVGLP    | -----   | --- | ---     | QPAGHAI    | P -TKTEEK-VD   |          |
| Nicotiana CHMP1    | IVKSLESSLA  | TGNLQKMS  | SET | MDKFEQQF  | VN  | MEVQAEFM | ES  | SMAGSTSLSTP   | EDQVNSLMH  | QVADDYGL | EV       | SVGLP    | -----   | --- | ---     | QAAGHAI    | P -TKDSEK-VD   |          |
| Chlamyd. CHMP1     | IVKSLEKAMA  | SNNLETIAN | T   | MTQFEKQF  | FEN | LDLQTVV  | DD  | VMGAQASLSTP   | EDVVSALVA  | QVAEEHGL | EL       | AVGMP    | -----   | --- | ---     | HAAAGTAR-  | ----PAAAKA     |          |
| Trypanosoma CHMP1  | MVHGMDKVQ   | SMNPEKISE | L   | MEKFEKQF  | FET | MDVASEY  | MET | AIGQTTSTSM    | PEDEVSLLLL | QVAEEEGL | AV       | KEELFNK  | KAK-    | --- | ---     | LPQQQP     | VAP -EATKLAEPD |          |
| Leishmania CHMP1   | MVKGMDKVLQ  | SMDPATIS  | R   | MDTFEQF   | FET | MDVTSAY  | MEG | AIGQSTAVTTP   | EDVNNLMS   | QVADEHGL | DI       | REQLNDNL | Q-      | --- | ---     | IKNTNLTAQ  | -KAAE-KQVE     |          |

|                    |            |       |
|--------------------|------------|-------|
| Gallus CHMP1A      | -DQLSRRLAA | LRN-- |
| Homo CHMP1A        | -DQLSRRLAA | LRN-- |
| Xenopus CHMP1A     | -DQLSRRLAS | LRN-- |
| Danio CHMP1A       | EDQLSRRLAA | LRN-- |
| Strongyloc. CHMP1A | EDRLTQRLQA | LRN-- |
| Gallus CHMP1B      | QDELSQRLAR | LRDQV |
| Homo CHMP1B        | QDELSQRLAR | LRDQV |
| Xenopus CHMP1B     | QDELSQRLAR | LRDQV |
| Danio CHMP1B       | QDELSQRLAK | LRDQV |
| Strongyloc. CHMP1A | QDELSARLAE | LRKM- |
| Anopheles CHMP1    | QDELTARLAR | LRQAE |
| Drosophila CHMP1   | QDELTQRLAR | LRQAE |
| Caenorhabd. CHMP1  | DKDLTERLAA | LRNM- |
| Ustilago DID2      | DDALAERLRA | LRPAT |
| Laccaria DID2      | DDKLAERLRA | LRPAT |
| Candida DID2       | EDKLAERLRA | LRG-- |
| Saccharomyces DID2 | EDKLAQRLRA | LRG-- |
| Pichia DID2        | EDKLAERLRA | LRS-- |
| Schizosach. DID2   | DDNLQERLRA | LRS-- |
| Physcom. CHMP1C    | EDDLSRRLAE | LKSRG |
| Physcom. CHMP1D    | EDDLSRRLAE | LKNRN |
| Physcom. CHMP1B    | EDDLSRRLAE | LRNRG |
| Physcom. CHMP1A    | EDDLSRRLAE | LKNRS |
| Oryza CHMP1        | EDDLSRRLAE | LKARG |
| Zea SAL1           | EDDLSRRLAE | LKARG |
| Arabidopsis CHMP1B | EDDLTRRLAE | LKARG |
| Arabidopsis CHMP1A | EDDLSRRLAE | LKARG |
| Nicotiana CHMP1    | EDDLTRRLAE | LKARG |
| Chlamyd. CHMP1     | EDDLTARLAE | LRGR- |
| Trypanosoma CHMP1  | LDELSARLDM | LRGK- |
| Leishmania CHMP1   | EDDLEAKFAQ | LRGR- |

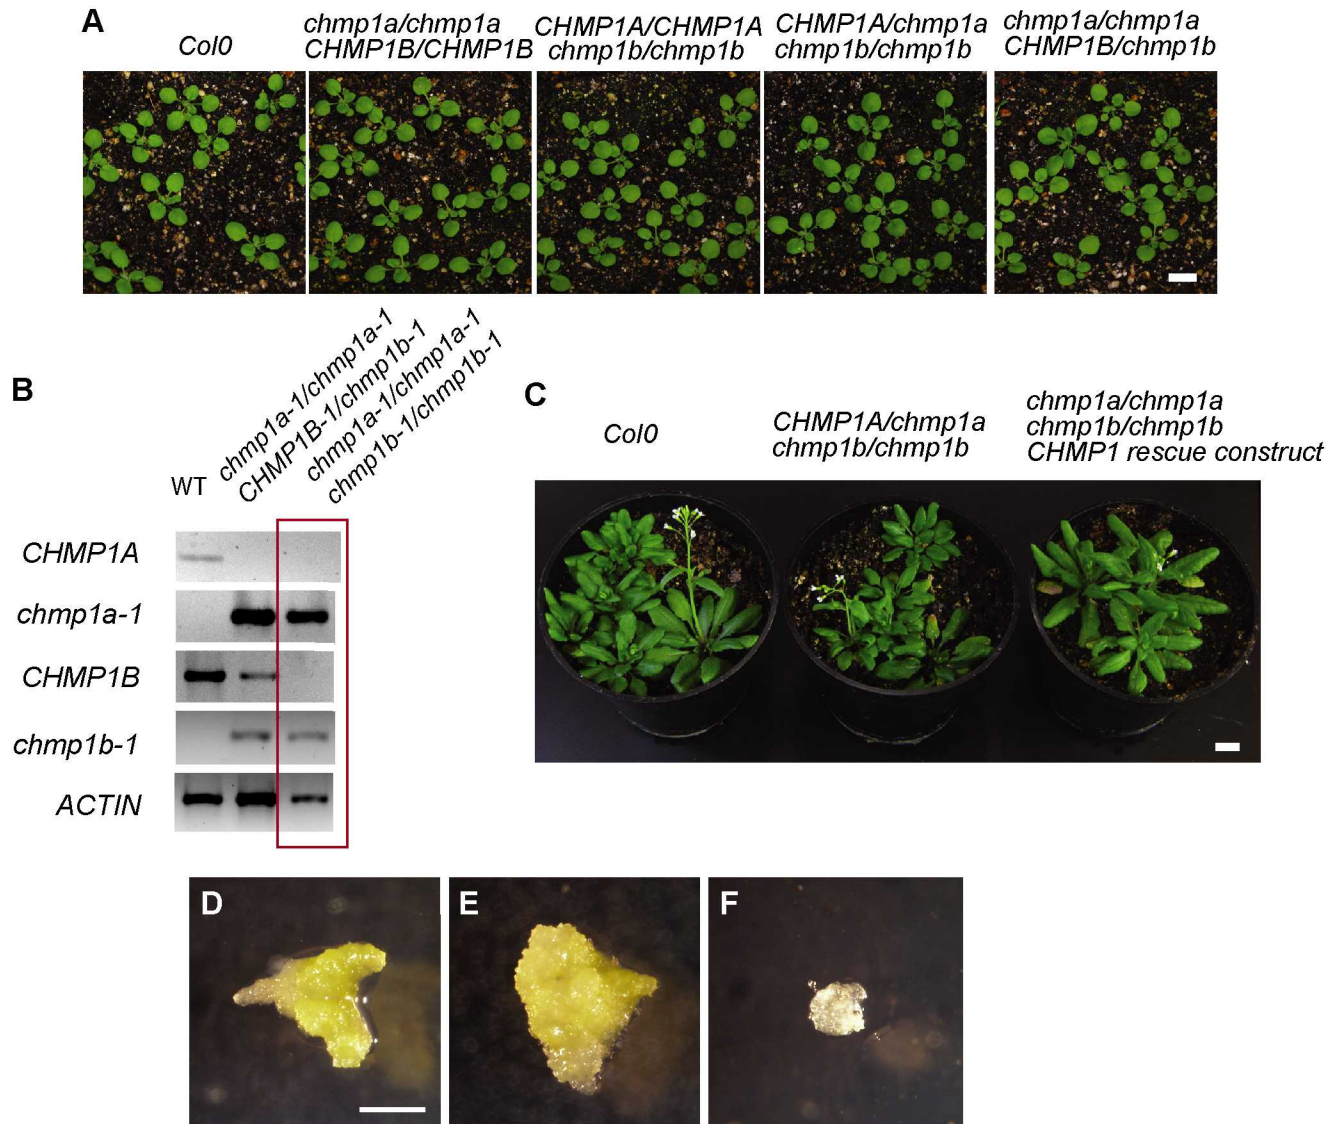

**Supplemental Figure 2: Phenotype of wild type, *chmp1* mutant, and rescued *chmp1a chmp1b* mutant seedlings. PCR-genotyping of embryos and proliferating calli induced from WT and mutant embryos.**

**(A)** Seedlings from WT (*Col-0*), single *chmp1a/chmp1a*, single *chmp1b/chmp1b*, *CHMP1A/chmp1a chmp1b/chmp1b*, and *chmp1a/chmp1a CHMP1B/chmp1b* mutants. Note that all mutant seedlings are indistinguishable from WT ones.

**(B)** PCR-genotyping of embryos from plants segregating the *chmp1a* and *chmp1b* mutant alleles.

**(C)** WT (*Col-0*), *CHMP1A/chmp1a chmp1b/chmp1b*, and double *chmp1a chmp1b* mutant plants rescued with a WT *CHMP1B* gene construct.

**(D)-(F)** Calli grown from excised WT **(D)**, WT-looking (containing two or more *chmp1* mutant alleles) **(E)** and *chmp1a chmp1b* mutant embryo **(F)**.

Bars in **(A)** and **(B)** = 10 mm; **(D)-(F)** = 1 mm

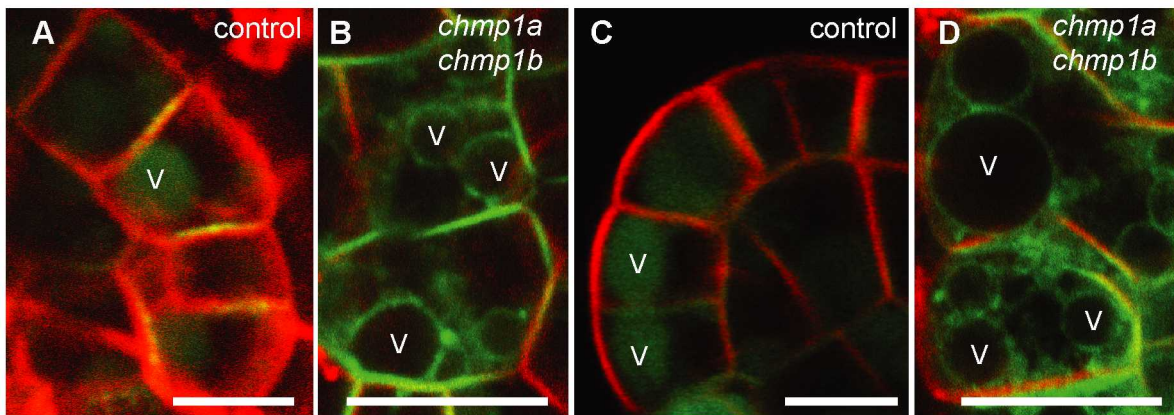

24h dark

48h dark

**Supplemental Figure 3:** Localization of PIN1-GFP in control and mutant embryos after dark treatment. Embryos were stained with FM4-64 to visualize cell outlines. Note the accumulation of PIN1-GFP in the vacuolar lumen in control embryo kept in the dark for 24h (A) and 48h (C). In *chmp1a chmp1b* mutant embryos dissected from the same plants (B) and (D), PIN1-GFP is only detected in the vacuolar membrane but not in the vacuolar lumen. V, vacuole. Bars = 10  $\mu$ m.

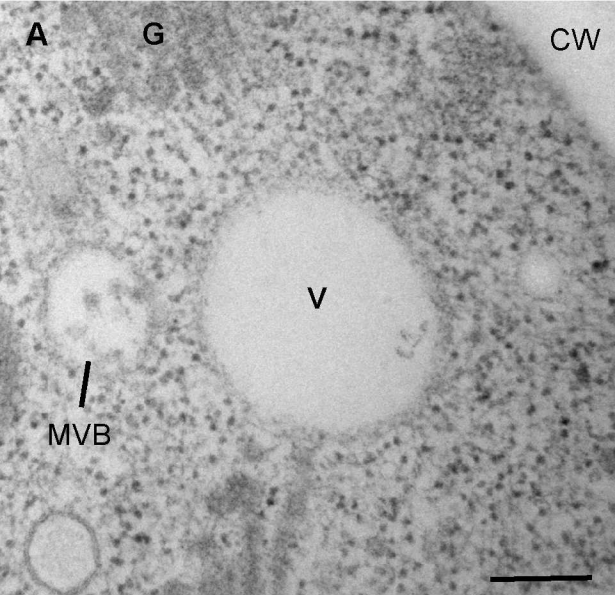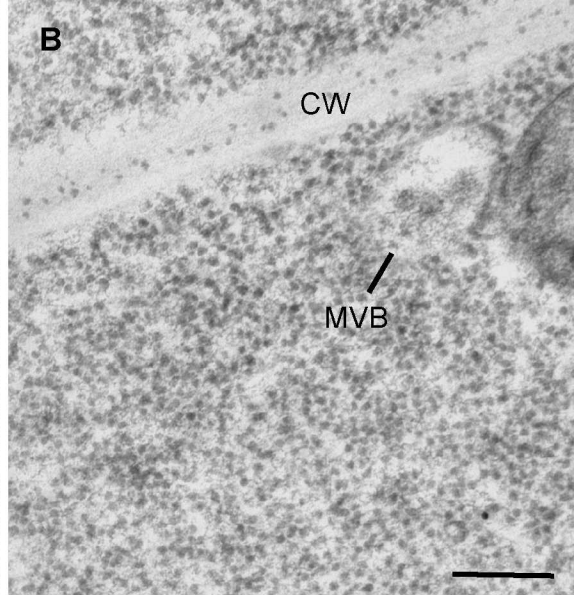

**Supplemental Figure 4:** Control labeling using anti-GFP antibodies on WT heart stage embryos. CW, cell wall; G, Golgi; V, vacuole. Bars = 200 nm

WT

*chmp1a chmp1b*

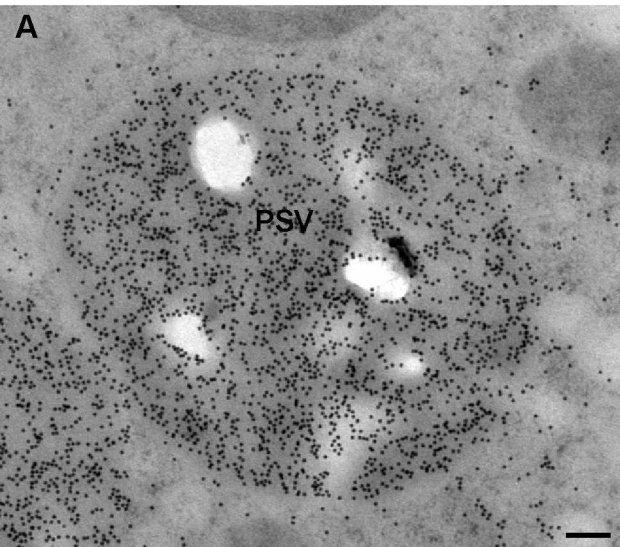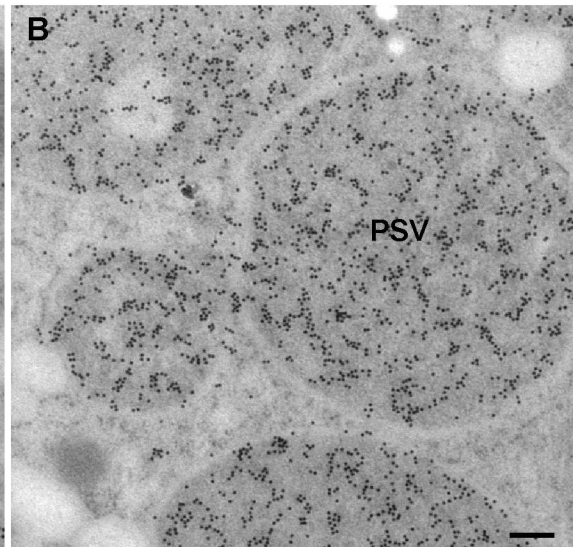

**Supplemental Figure 5:** Immunolabeling of 2S albumins in PSVs of WT (**A**) and *chmp1a chmp1b* mutant (**B**) embryos. Bars = 100 nm.
